# Supplementary material
Source: publisher site journal article supplement (https://www.spandidos-publications.com/8176/downloadSupplementary)

Figure S1. Heatmap showing Spearman correlation coefficients between EMT-related markers. Red and blue indicate positive and negative correlation, respectively. ZEB1, zinc finger enhancer-box homeobox 1; miR-200c-3p, microRNA-200c-3p.

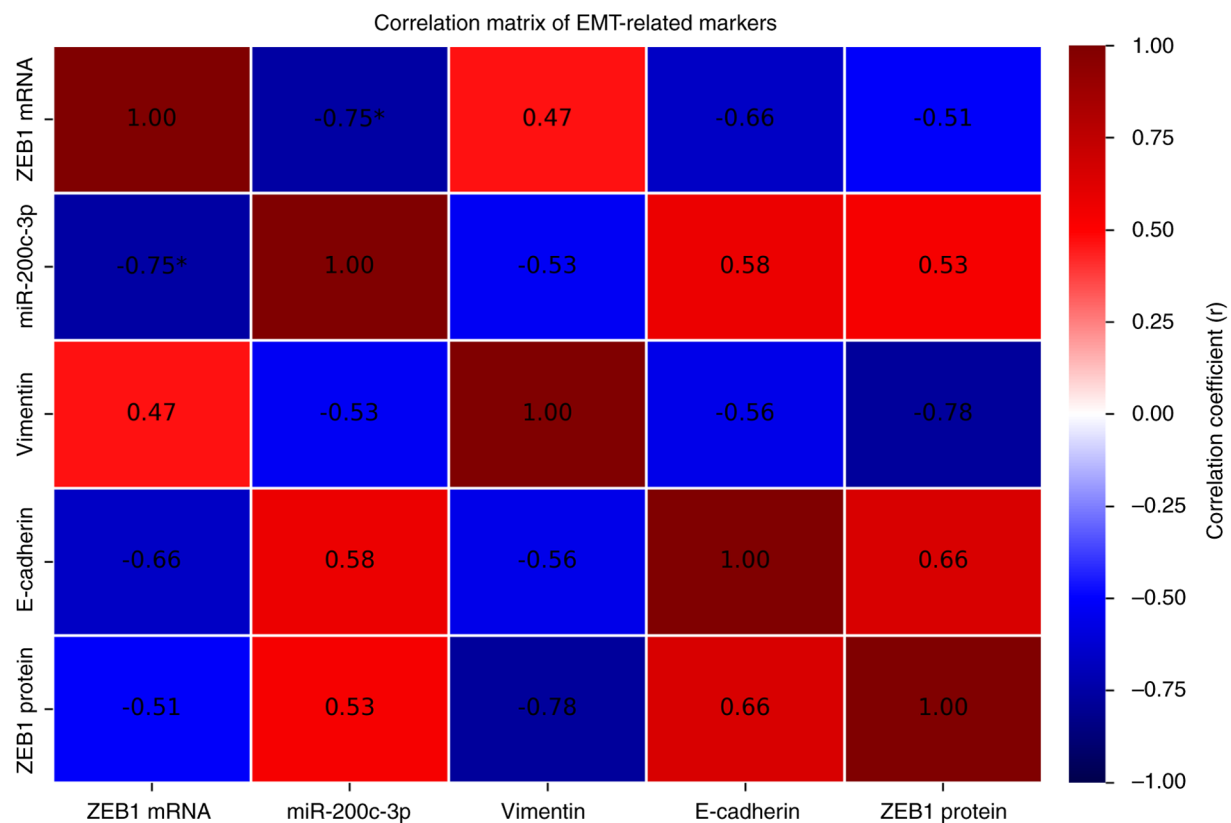

Supplement: Supplementary file 1 [file downloadSupplementary]
